# Supplementary material for: Resolving Entangled JH-H-Coupling Patterns for Steroidal Structure Determinations by NMR Spectroscopy
Source: MDPI journal article supplement (doi:10.3390/molecules26092643), 2021-04-30
Supplement: s1 [file s1]

# **Resolving Entangled $J_{\text{H-H}}$ -Coupling Patterns for Steroidal Structure Determinations by NMR Spectroscopy**

Danni Wu<sup>1</sup>, Kathleen D. Carillo<sup>1,2,3</sup>, Jiun-Jie Shie<sup>1</sup>, Steve S.-F. Yu<sup>1</sup> and  
Der-Lii M. Tzou<sup>1,4,\*</sup>

<sup>1</sup> Institute of Chemistry, Academia Sinica, Nankang, Taipei 11529, Taiwan ROC

<sup>2</sup> Taiwan International Graduate Program, Sustainable Chemical Science and Technology (SCST), Academia Sinica, Nankang, Taipei 11529, Taiwan

<sup>3</sup> The Department of Applied Chemistry, National Yang Ming Chiao Tung University, Hsinchu 30013, Taiwan

<sup>4</sup> Department of Applied Chemistry, National Chia-Yi University, Chia-Yi 60004, Taiwan, ROC

## **Supplementary information**

\*To whom correspondence should be addressed: Dr. Der-Lii M. Tzou, Institute of Chemistry, Academia Sinica 128, Academia Rd., Sec. 2, Nankang, Taipei 11529, Taiwan, Republic of China, Tel: +886 2 55728524, fax: +886 2 55721237, E-mail: [tzougate@gate.sinica.edu.tw](mailto:tzougate@gate.sinica.edu.tw)

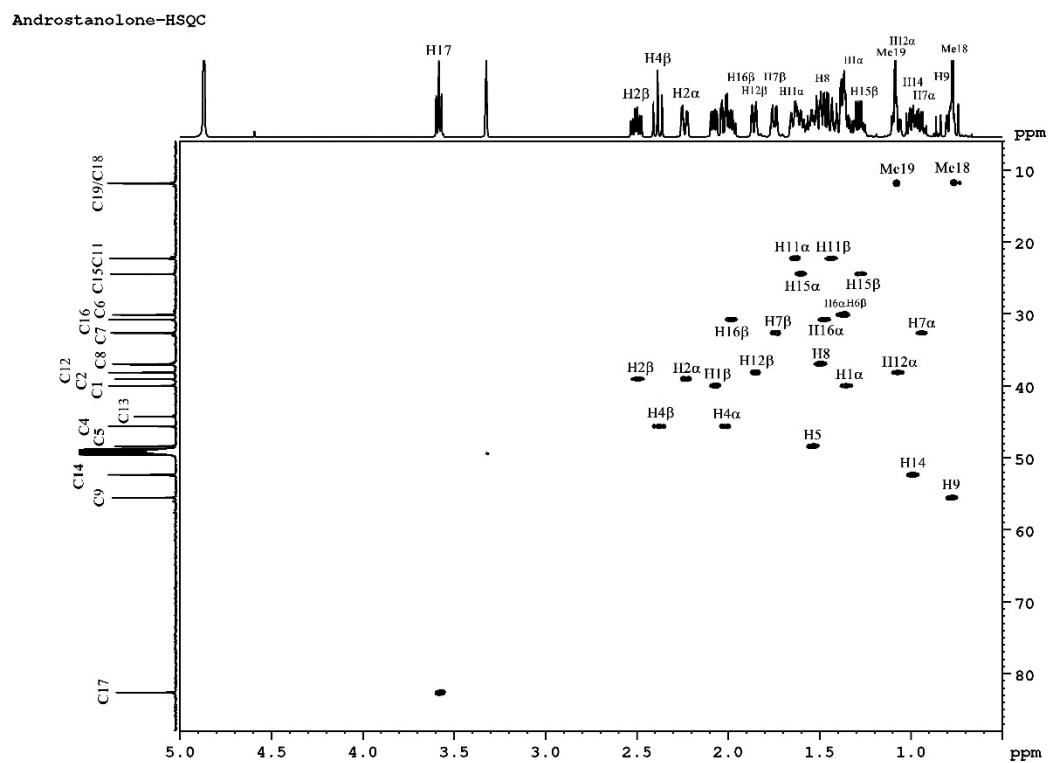

**Figure S1.** Solution <sup>1</sup>H/<sup>13</sup>C 2D HSQC NMR spectrum of **1** dissolved in *d*<sub>4</sub>-MeOH solution. The <sup>1</sup>H and <sup>13</sup>C chemical shift assignments were indicated on each of the projection profiles. All <sup>1</sup>H and <sup>13</sup>C chemical shifts are tabulated in Tables 1 & S1.

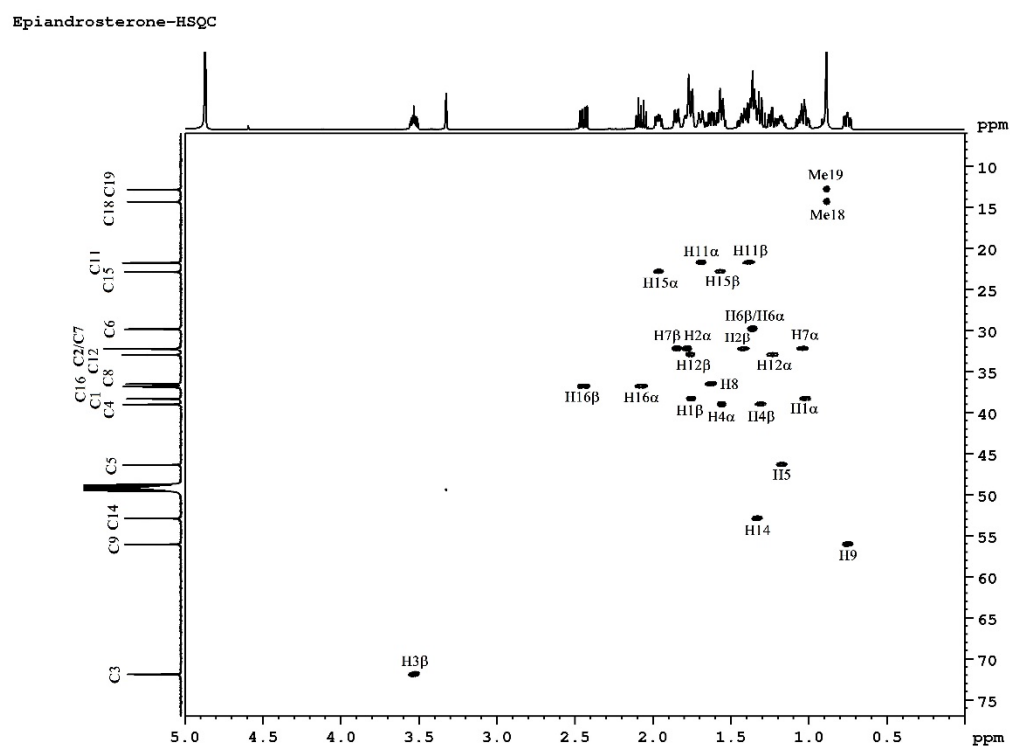

**Figure S2.** Solution  $^1\text{H}/^{13}\text{C}$  2D HSQC NMR spectrum of **2** dissolved in  $d_4$ -MeOH solution. The  $^1\text{H}$  and  $^{13}\text{C}$  chemical shift assignments were indicated on each of the projection profiles. All  $^1\text{H}$  and  $^{13}\text{C}$  chemical shifts are tabulated in Tables 1 & S1.

(a)

Androstanolone-DEPT90

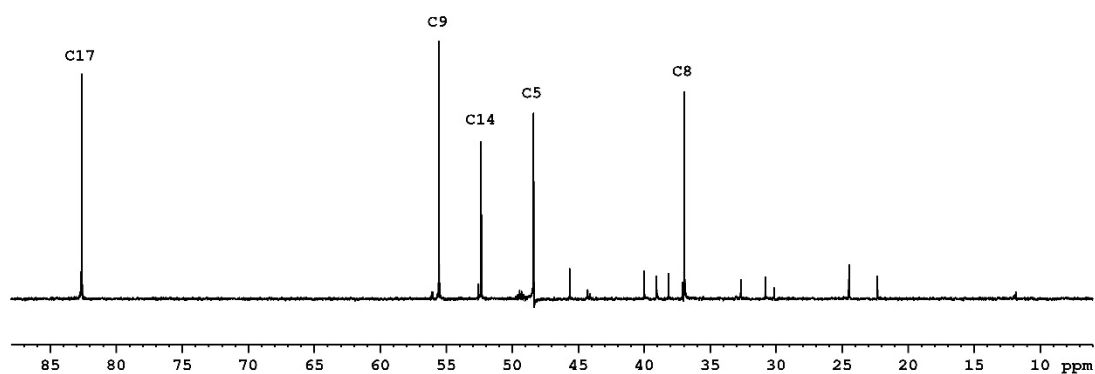

(b)

Androstanolone-DEPT135

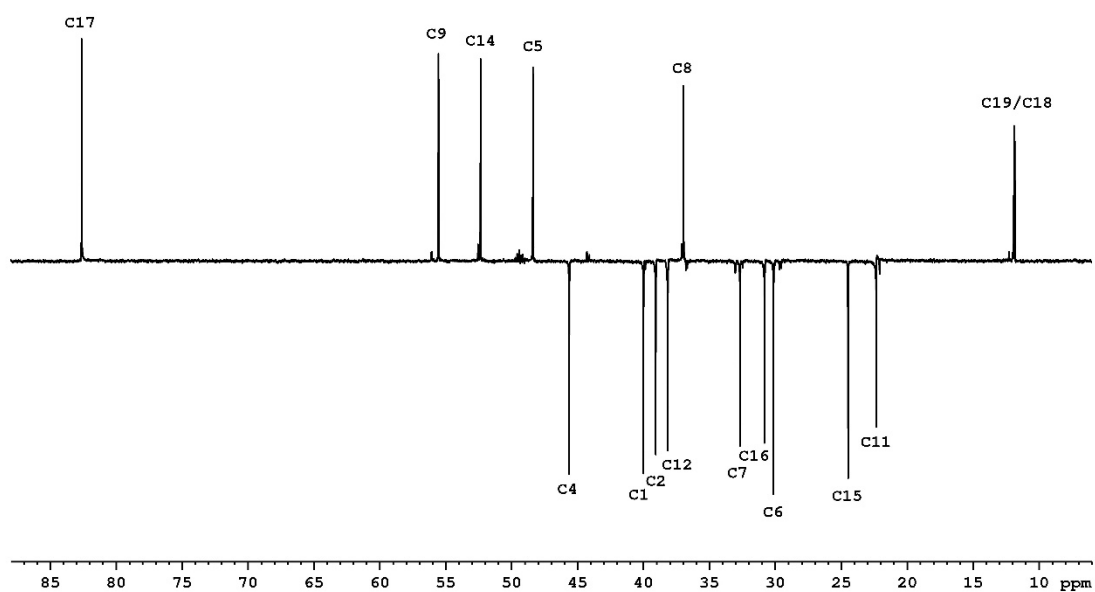

**Figure S3.** Solution  $^1\text{H}/^{13}\text{C}$  DEPT NMR spectrum of **1** dissolved in  $d_4$ -MeOH solution. (a) Solution DEPT-90 spectrum and (b) DEPT-135 spectrum of **1**. The  $^{13}\text{C}$  chemical shift assignments were indicated on each of the  $^1\text{H}$  correlated  $^{13}\text{C}$  signals. All  $^1\text{H}$  and  $^{13}\text{C}$  chemical shifts are tabulated in Tables 1 & S1.

(a)

Epiandrosterone-DEPT90

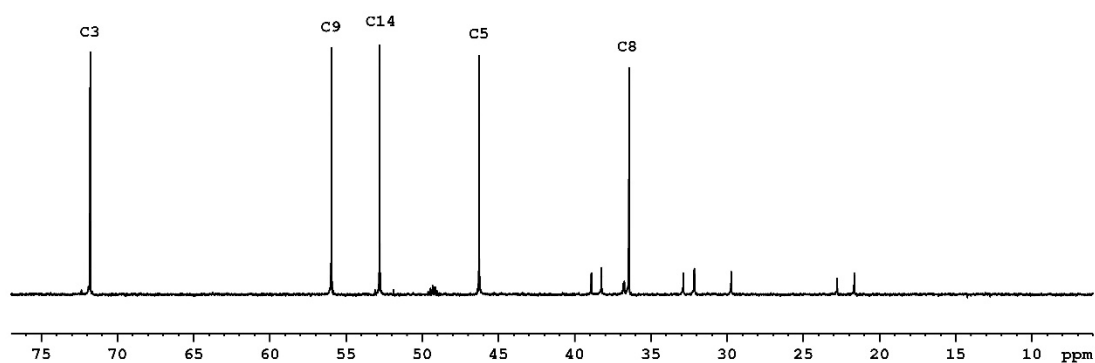

(b)

Epiandrosterone-DEPT135

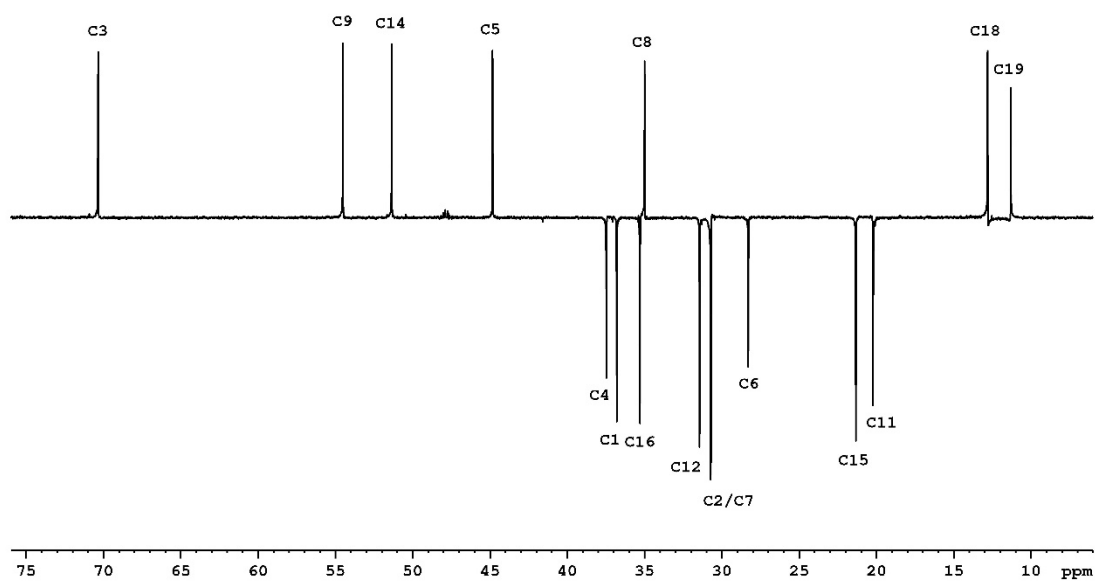

**Figure S4.** Solution  $^1\text{H}/^{13}\text{C}$  DEPT NMR spectrum of **2** dissolved in  $d_4$ -MeOH solution. (a) Solution DEPT-90 spectrum (b) and DEPT-135 spectrum of **2**. The  $^{13}\text{C}$  chemical shift assignments were indicated on each of the  $^1\text{H}$  correlated  $^{13}\text{C}$  signals. All  $^1\text{H}$  and  $^{13}\text{C}$  chemical shifts are tabulated in Tables 1 & S1.

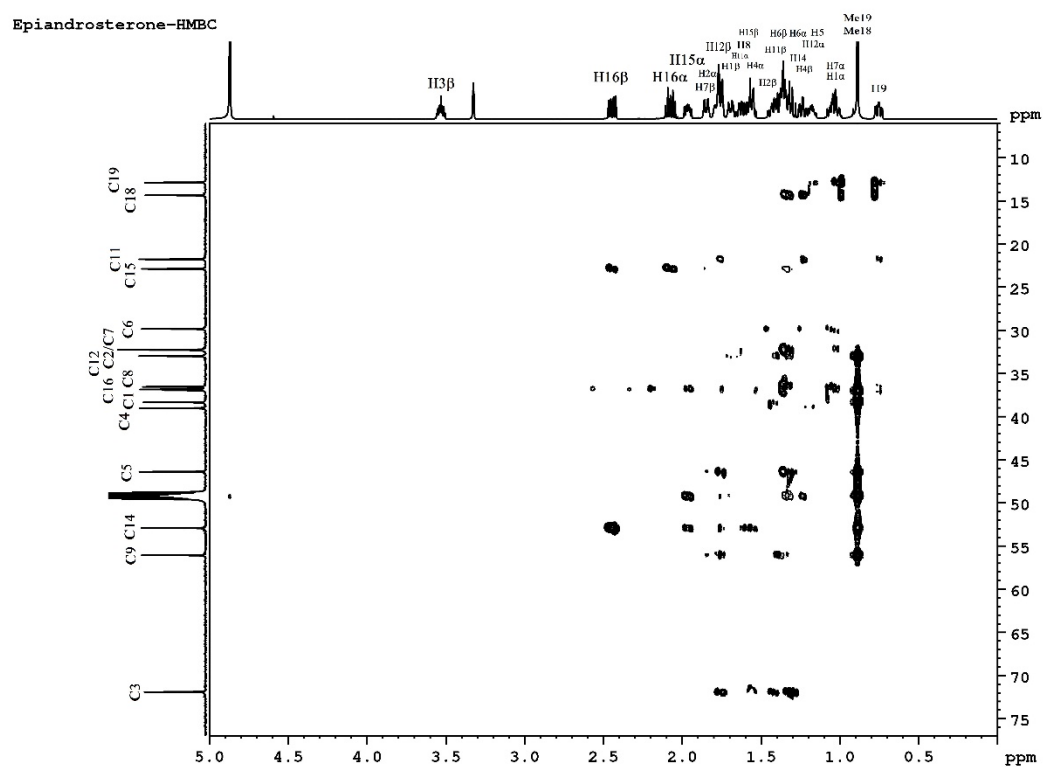

**Figure S5.** Solution  $^1\text{H}/^{13}\text{C}$  2D HMBC NMR spectrum of **1** dissolved in  $d_4$ -MeOH solution. The  $^1\text{H}$  and  $^{13}\text{C}$  chemical shift assignments were indicated on each of the projection profiles. All  $^1\text{H}$  and  $^{13}\text{C}$  chemical shifts are tabulated in Tables 1 & S1.



**Figure S6.** Solution  $^1\text{H}/^{13}\text{C}$  2D HMBC NMR spectrum of **2** dissolved in  $d_4$ -MeOH solution. The  $^1\text{H}$  and  $^{13}\text{C}$  chemical shift assignments were indicated on each of the projection profiles. All  $^1\text{H}$  and  $^{13}\text{C}$  chemical shifts are tabulated in Tables 1 & S1.

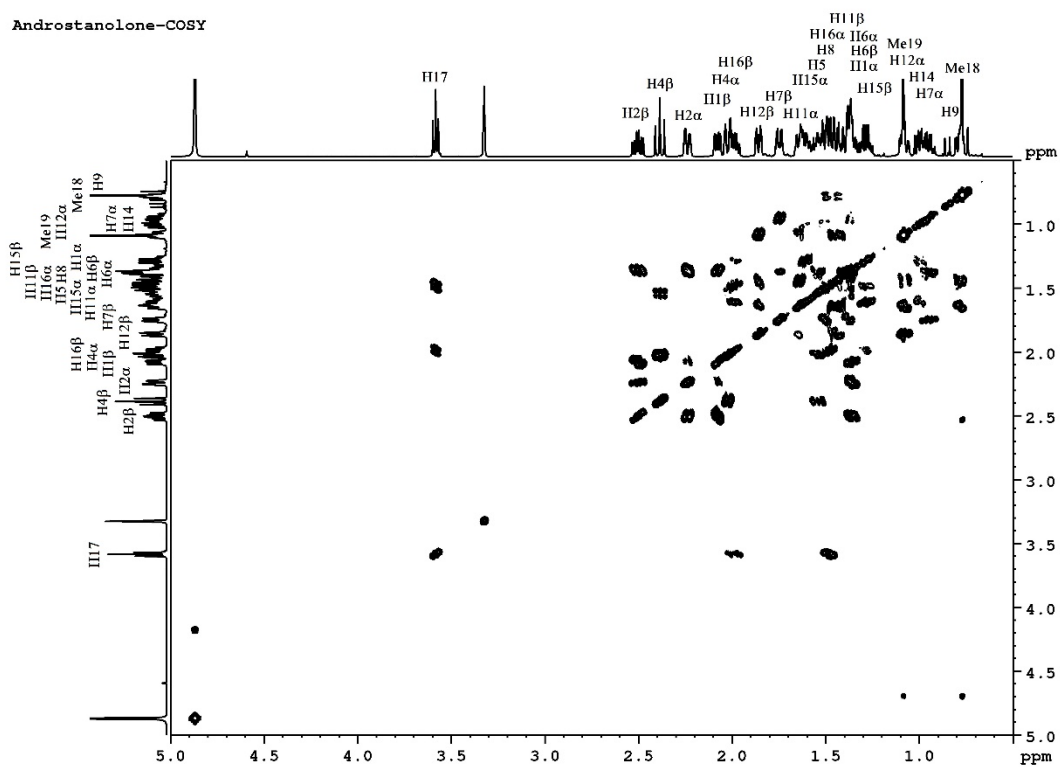

**Figure S7.** Solution 2D COSY NMR spectrum of **1** dissolved in  $d_4$ -MeOH solution. The  $^1\text{H}$  chemical shift assignments were indicated on each of the projection profiles. All  $^1\text{H}$  chemical shifts are tabulated in Table 1.



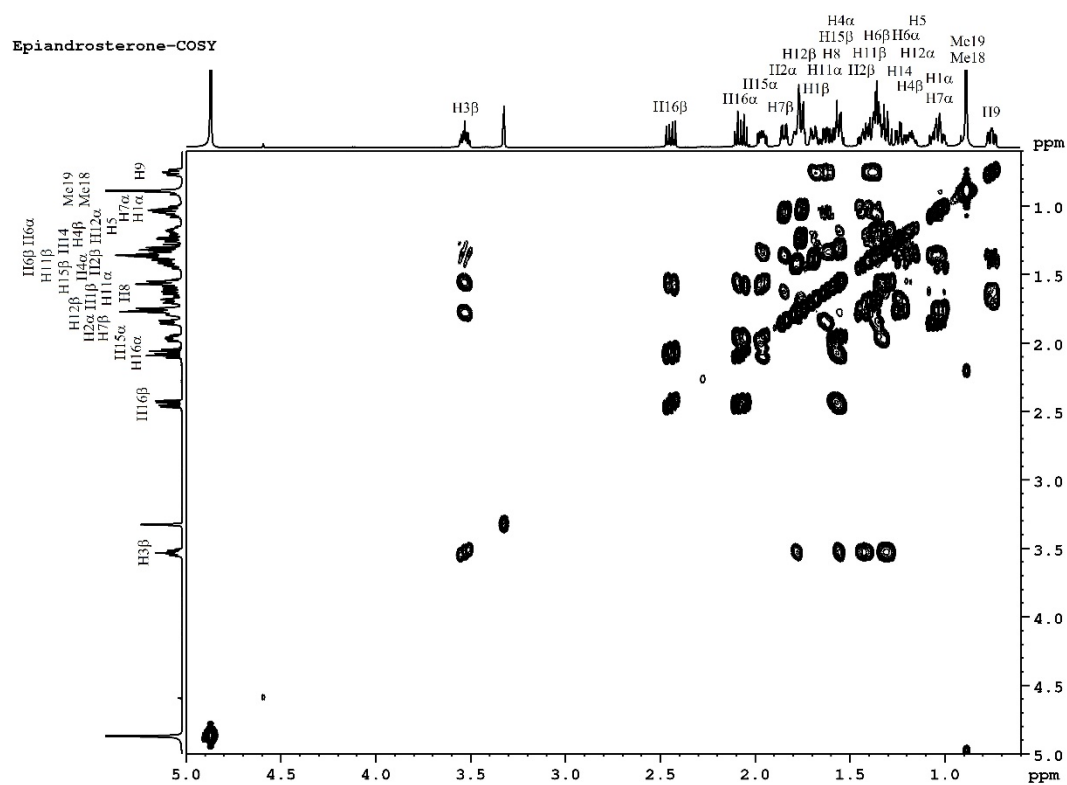

**Figure S8.** Solution 2D COSY NMR spectrum of **2** dissolved in  $d_4$ -MeOH solution. The  $^1\text{H}$  chemical shift assignments were indicated on each of the projection profiles. All  $^1\text{H}$  chemical shifts are tabulated in Table 2.

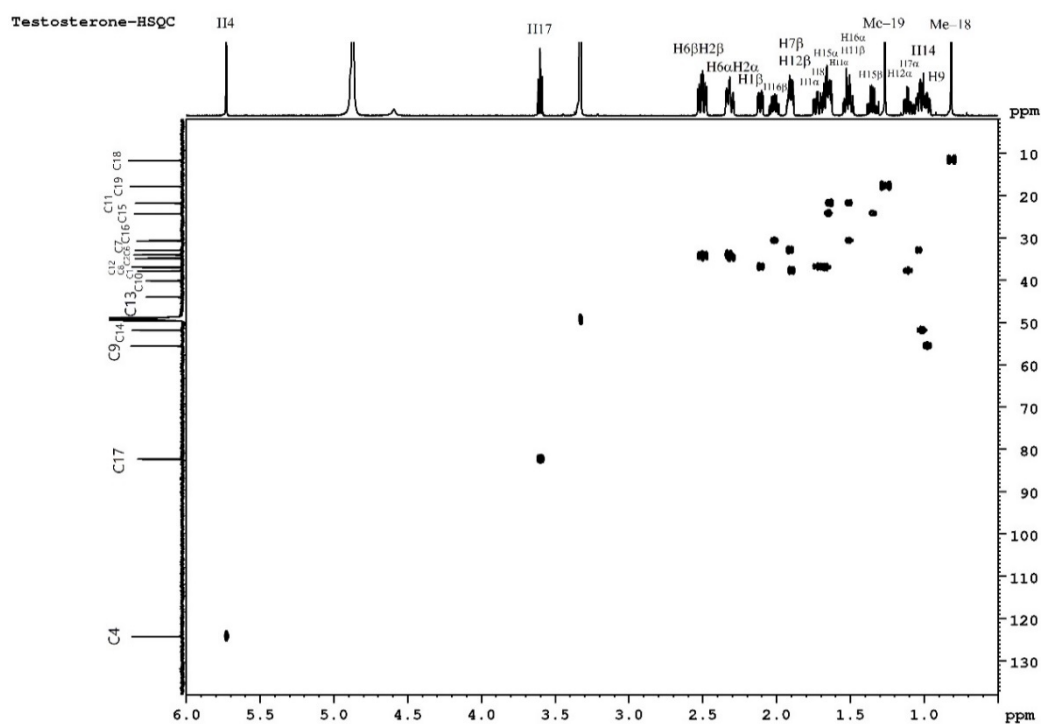

**Figure S9.** Solution  $^1\text{H}/^{13}\text{C}$  2D HSQC NMR spectrum of **3** dissolved in  $d_4$ -MeOH solution. The  $^1\text{H}$  and  $^{13}\text{C}$  chemical shift assignments were indicated on each of the projection profiles.

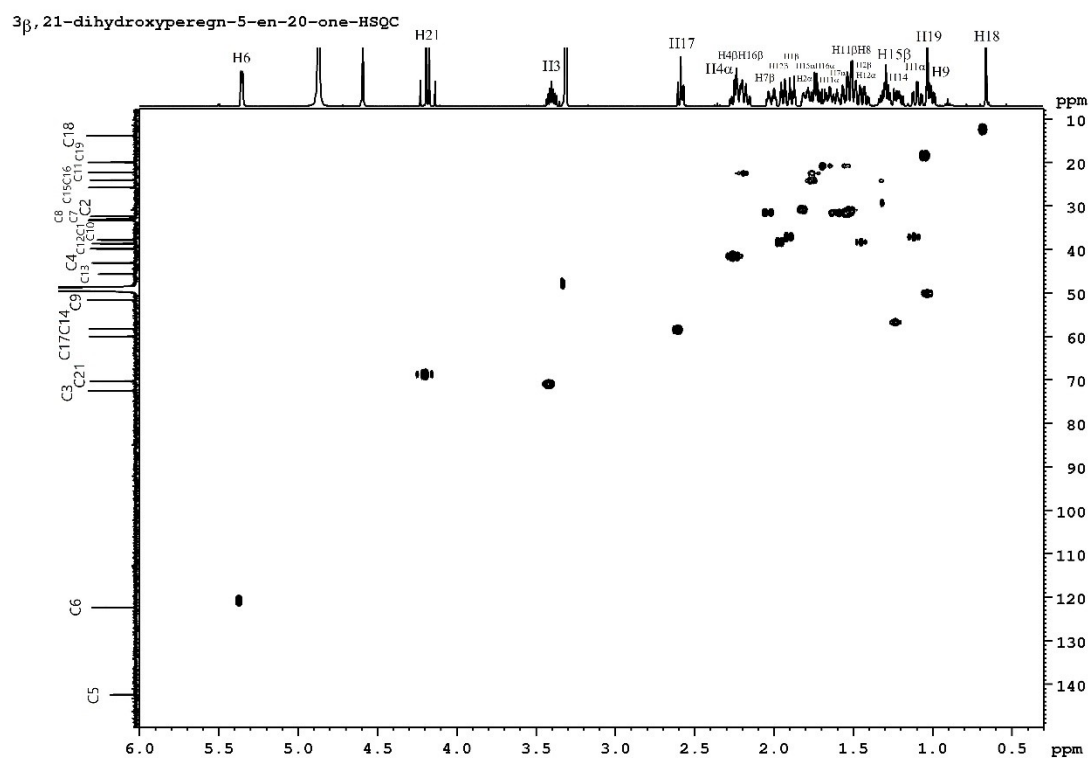

**Figure S10.** Solution  $^1\text{H}/^{13}\text{C}$  2D HSQC NMR spectrum of **4** dissolved in  $d_4$ -MeOH solution. The  $^1\text{H}$  and  $^{13}\text{C}$  chemical shift assignments were indicated on each of the projection profiles.

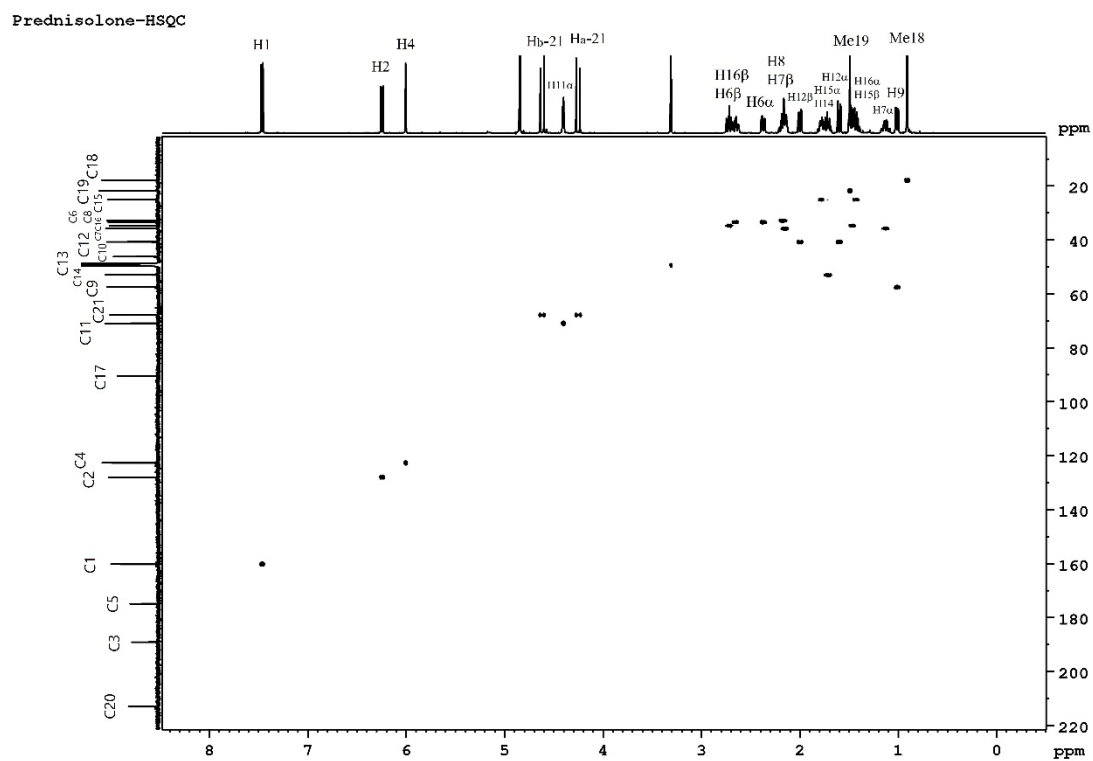

**Figure S11.** Solution  $^1\text{H}/^{13}\text{C}$  2D HSQC NMR spectrum of **5** dissolved in  $d_4$ -MeOH solution. The  $^1\text{H}$  and  $^{13}\text{C}$  chemical shift assignments were indicated on each of the projection profiles.

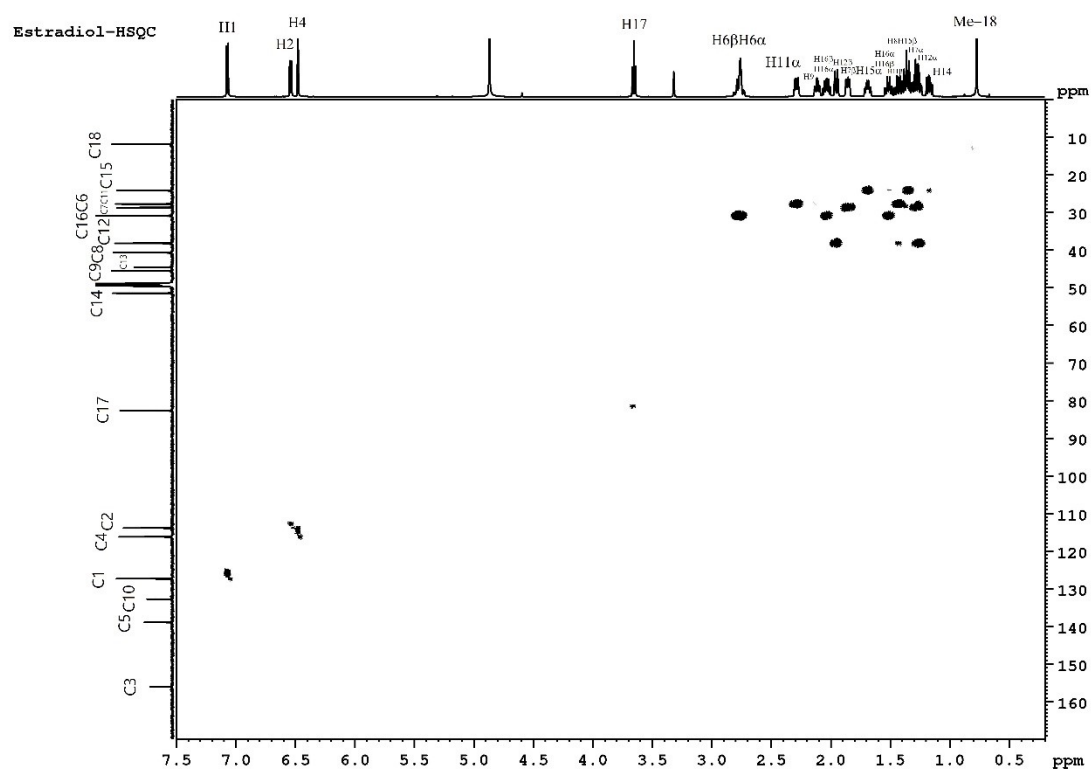

**Figure S12.** Solution  $^1\text{H}/^{13}\text{C}$  2D HSQC NMR spectrum of **6** dissolved in  $d_4$ -MeOH solution. The  $^1\text{H}$  and  $^{13}\text{C}$  chemical shift assignments were indicated on each of the projection profiles.

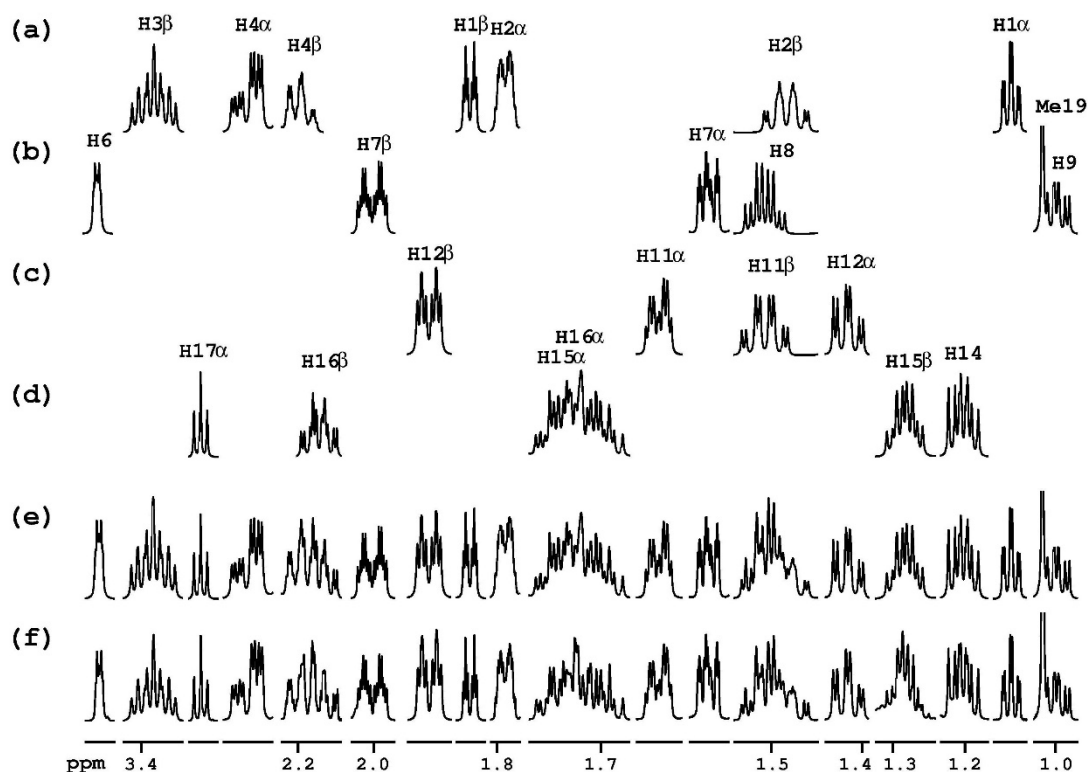

**Figure S13.** Characteristic  $^1\text{H}$  NMR segmental spectra patterns of steroidal compound **4**. Four subspectra were generated using the Daisy software program, corresponding to steroidal rings (a) A, (b) B, (c) C and (d) D, respectively. Given the  $^1\text{H}$  chemical shifts deduced from the 2D HSQC measurements (Supporting Information Fig. S10) and associated  $J_{\text{H-H}}$  coupling constants determined from **1** and **2** (Table 1), one was able to construct the  $^1\text{H}$  NMR subspectra and to identify spectral patterns in different steroidal compounds; for details see text. (e) A summation of the four subspectra (a), (b), (c) and (d) in the simulation of the respective  $^1\text{H}$  NMR spectrum. (f) Experimental  $^1\text{H}$  NMR spectrum. For better clarity, the subspectra are presented on different scales.

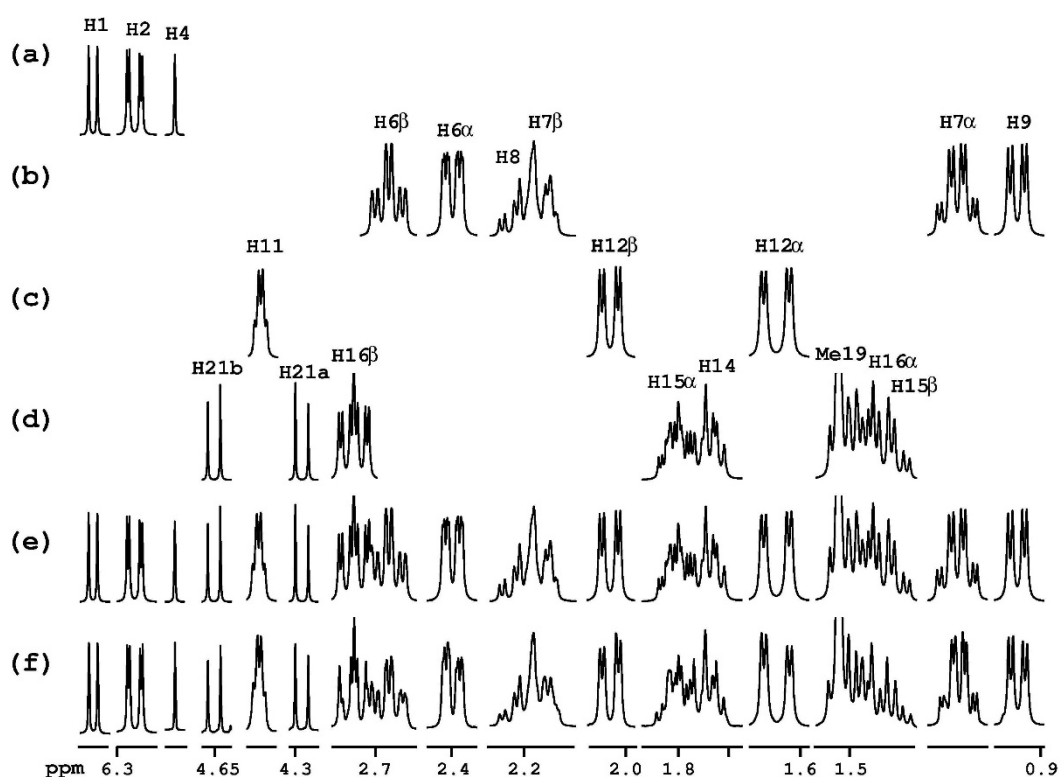

**Figure S14.** Characteristic  $^1\text{H}$  NMR segmental spectra patterns of steroidal compound **5**. Four subspectra were generated using the Daisy software program, corresponding to steroidal rings (a) A, (b) B, (c) C and (d) D, respectively. Given the  $^1\text{H}$  chemical shifts deduced from the 2D HSQC measurements (Supporting Information Fig. S11) and associated  $J_{\text{H-H}}$  coupling constants determined from **1** and **2** (Table 1), one was able to construct the  $^1\text{H}$  NMR subspectra and to identify spectral patterns in different steroidal compounds; for details see text. (e) A summation of the four subspectra (a), (b), (c) and (d) in the simulation of the respective  $^1\text{H}$  NMR spectrum. (f) Experimental  $^1\text{H}$  NMR spectrum. For better clarity, the subspectra are presented on different scales.

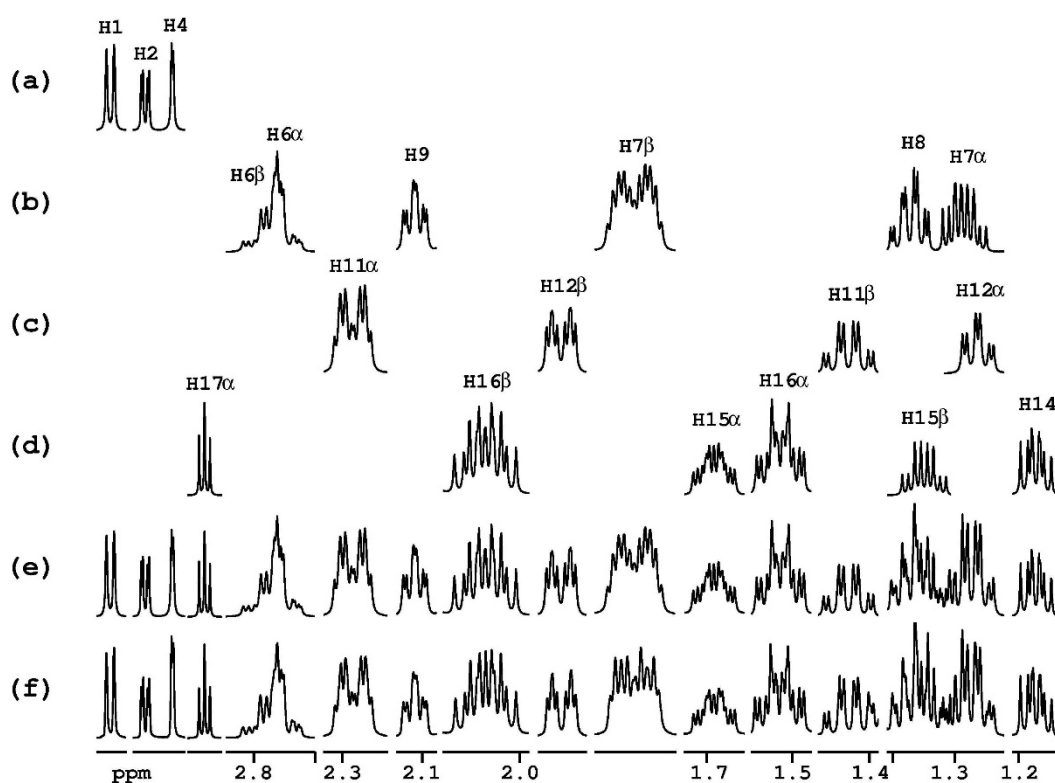

**Figure S15.** Characteristic  $^1\text{H}$  NMR segmental spectra patterns of steroidal compound **6**. Four subspectra were generated using the Daisy software program, corresponding to steroidal rings (a) A, (b) B, (c) C and (d) D, respectively. Given the  $^1\text{H}$  chemical shifts deduced from the 2D HSQC measurements (Supporting Information Fig. S12) and associated  $J_{\text{H-H}}$  coupling constants determined from **1** and **2** (Table 1), one was able to construct the  $^1\text{H}$  NMR subspectra and to associate the spectral similarities among different steroidal compounds; for details see text. (e) A summation of the four subspectra (a), (b), (c) and (d) in the simulation of the respective  $^1\text{H}$  NMR spectrum. (f) Experimental  $^1\text{H}$  NMR spectrum. For better clarity, the subspectra are presented on different scales.



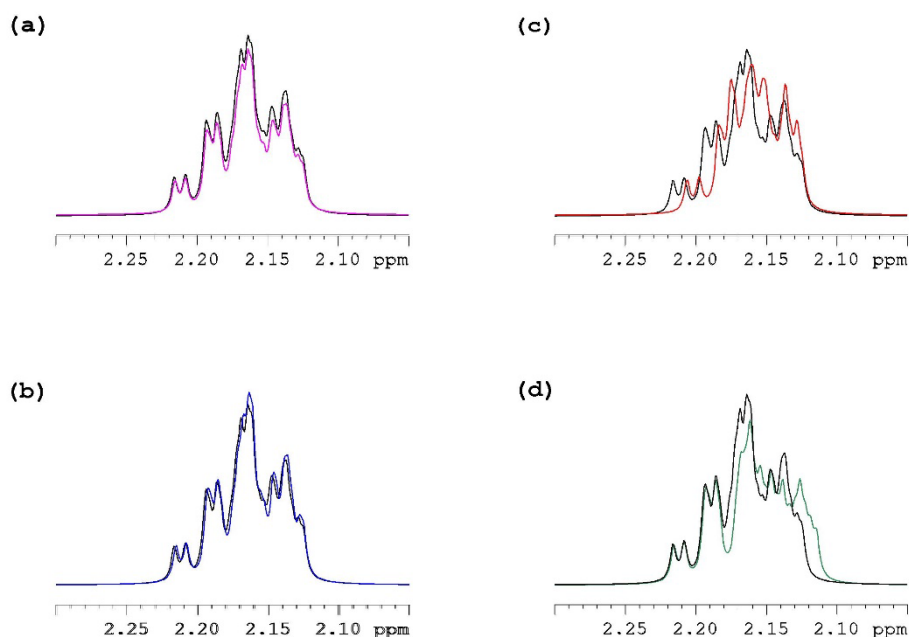

**Figure S16.** Superimpositions of multiple doublet splitting patterns of overlapped signals of **5** in various combinations. Simulations of two overlapped H7 $\beta$  and H8 signal patterns at 2.137 ppm (12.86, 5.6, 4.1, 1.87 Hz) & 2.177 ppm (12.32, 11.25, 10.9, 4.1 Hz) colored in black. (a) simulation colored in pink; H7 $\beta$  same as black, and H8: 2.177 ppm (12.32, 11.25, 10.9, 3.8 Hz), with a coupling constant deviation 0.3 Hz; (b) simulation colored in blue; H7 $\beta$  same as black, and H8: 2.167 ppm (12.32, 11.25, 10.9, 4.1 Hz), with a deviation 0.01 ppm in the chemical shifts, (c) simulation colored in red; H8 same as black, and H7 $\beta$ : 2.137 ppm (12.86, 5.6, 4.1, 2.17 Hz), with a coupling constant deviation 0.3 Hz; (d) simulation colored in green; H8 same as black, and H7 $\beta$ : 2.127 ppm (12.86, 5.6, 4.1, 1.87 Hz), with a deviation 0.01 ppm in the chemical shifts. As suggested by the spectral differences, one is able to refine the associated  $J_{\text{H-H}}$  values and their chemical shifts from for the curve fitting, revealing an accuracy of 0.01 ppm for the chemical shifts and 0.3 Hz for the  $J_{\text{H-H}}$  values. A linewidth of 1.5 Hz was added into these simulations to mimic the line broadening of experimental data in the curve fitting simulation process.

**Table S1.**  $^{13}\text{C}$  chemical shift assignments of Androstanolone (**1**) and Epiandrosterone (**2**) <sup>a</sup>

| Carbon | $^{13}\text{C}$ chemical shifts (ppm) |          |
|--------|---------------------------------------|----------|
|        | <b>1</b>                              | <b>2</b> |
| C1     | 40.0                                  | 38.3     |
| C2     | 39.1                                  | 32.3     |
| C3     | 214.9                                 | 71.9     |
| C4     | 45.6                                  | 39.0     |
| C5     | 48.4                                  | 46.4     |
| C6     | 30.1                                  | 29.8     |
| C7     | 32.7                                  | 32.2     |
| C8     | 37.0                                  | 36.5     |
| C9     | 55.5                                  | 56.1     |
| C10    | 37.1                                  | 36.9     |
| C11    | 22.3                                  | 21.8     |
| C12    | 38.1                                  | 33.0     |
| C13    | 44.3                                  | 49.3     |
| C14    | 52.4                                  | 52.9     |
| C15    | 24.5                                  | 22.9     |
| C16    | 30.8                                  | 36.8     |
| C17    | 82.6                                  | 224.2    |
| C18    | 11.8                                  | 14.3     |
| C19    | 11.9                                  | 12.8     |

<sup>a</sup> Chemical shift are in units of ppm referenced to the Methanol- $d_4$  at 49.15 ppm, within an uncertainty of  $\pm 0.1$  ppm and was examined by AV500.

**Table S2.** H(X)-C-C-H(Y) dihedral angles deduced from the vicinal  $^3J_{H-H}$  coupling constants of **1**

| X-Y                      | NMR <sup>a</sup> | X-ray <sup>b</sup> | Ab initio |
|--------------------------|------------------|--------------------|-----------|
| 1 $\alpha$ -2 $\alpha$   | 49.9             | 47.0               | 52.8      |
| 1 $\beta$ -2 $\alpha$    | 72.5             | 67.7               | 68.8      |
| 1 $\beta$ -2 $\beta$     | 42.5             | 51.4               | 42.6      |
| 4 $\alpha$ -5            | 60.0             | 52.0               | 59.5      |
| 5-6 $\alpha$             | 60.0             | 58.0               | 60.7      |
| 5-6 $\beta$              | 159.4            | 179.4              | 160.1     |
| 6 $\alpha$ -7 $\alpha$   | 49.9             | 60.2               | 52.1      |
| 6 $\alpha$ -7 $\beta$    | 68.3             | 55.5               | 65.9      |
| 6 $\beta$ -7 $\alpha$    | 162.0            | 174.5              | 166.5     |
| 6 $\beta$ -7 $\beta$     | 63.9             | 58.7               | 48.4      |
| 7 $\alpha$ -8            | 162.0            | 173.1              | 174.7     |
| 7 $\beta$ -8             | 58.6             | 54.1               | 56.4      |
| 8-9                      | 154.2            | 172.7              | 155.8     |
| 8-14                     | 152.8            | 173.3              | 156.4     |
| 9-11 $\alpha$            | 60.0             | 71.9               | 62.0      |
| 9-11 $\beta$             | 168.8            | 165.0              | 169.4     |
| 11 $\alpha$ -12 $\alpha$ | 60.0             | 63.9               | 64.4      |
| 11 $\alpha$ -12 $\beta$  | 68.3             | 68.7               | 68.4      |
| 11 $\beta$ -12 $\beta$   | 58.6             | 39.7               | 38.3      |
| 14 $\alpha$ -15 $\alpha$ | 36.2             | 40.7               | 39.8      |
| 14 $\alpha$ -15 $\beta$  | 160.3            | 164.0              | 164.1     |
| 15 $\alpha$ -16 $\alpha$ | 20.8             | 9.2                | 18.0      |
| 15 $\alpha$ -16 $\beta$  | 111.4            | 112.8              | 112.2     |
| 15 $\beta$ -16 $\alpha$  | 125.8            | 119.0              | 138.9     |
| 16 $\alpha$ -17 $\alpha$ | 31.6             | 30.1               | 29.6      |
| 16 $\beta$ -17 $\alpha$  | 142.0            | 137.9              | 144.6     |

<sup>a</sup> The dihedral angles in degree deduced from the vicinal  $^3J_{H-H}$  coupling constants according to Bothner-By equation <sup>[20]</sup>.

<sup>b</sup> The dihedral angles extracted from the X-ray structure of **1** reported in literature <sup>[21]</sup>.

**Table S3.** H(X)-C-C-H(Y) dihedral angles deduced from the vicinal  $^3J_{H-H}$  coupling constants of **2**

| X-Y                      | NMR <sup>a</sup> | X-ray <sup>b</sup> | Ab initio |
|--------------------------|------------------|--------------------|-----------|
| 1 $\alpha$ -2 $\alpha$   | 56.5             | 62.5               | 55.9      |
| 1 $\beta$ -2 $\alpha$    | 72.5             | 54.7               | 69.0      |
| 1 $\beta$ -2 $\beta$     | 63.9             | 68.4               | 60.9      |
| 2 $\alpha$ -3            | 57.2             | 50.9               | 53.3      |
| 2 $\beta$ -3             | 158.6            | 169.6              | 175.4     |
| 3-4 $\alpha$             | 53.1             | 58.7               | 51.3      |
| 3-4 $\beta$              | 153.5            | 177.3              | 156.6     |
| 4 $\alpha$ -5            | 63.9             | 57.7               | 60.4      |
| 4 $\beta$ -5             | 167.4            | 173.8              | 170.0     |
| 5-6 $\alpha$             | 60.0             | 57.6               | 56.2      |
| 5-6 $\beta$              | 162.0            | 173.8              | 163.5     |
| 6 $\alpha$ -7 $\alpha$   | 60.0             | 53.0               | 62.8      |
| 6 $\alpha$ -7 $\beta$    | 68.3             | 63.6               | 62.1      |
| 6 $\beta$ -7 $\alpha$    | 180.0            | 170.3              | 169.1     |
| 6 $\beta$ -7 $\beta$     | 63.9             | 53.8               | 66.0      |
| 7 $\alpha$ -8            | 162.0            | 178.6              | 162.7     |
| 7 $\beta$ -8             | 58.6             | 53.7               | 41.2      |
| 8-9                      | 154.2            | 178.9              | 158.1     |
| 8-14                     | 152.8            | 178.5              | 152.3     |
| 9-11 $\alpha$            | 60.0             | 58.9               | 62.5      |
| 9-11 $\beta$             | 168.8            | 174.6              | 169.6     |
| 11 $\alpha$ -12 $\alpha$ | 60.0             | 60.0               | 61.3      |
| 11 $\alpha$ -12 $\beta$  | 68.3             | 58.2               | 65.0      |
| 11 $\beta$ -12 $\beta$   | 58.6             | 54.6               | 41.6      |
| 14 $\alpha$ -15 $\alpha$ | 48.1             | 47.0               | 48.6      |
| 14 $\alpha$ -15 $\beta$  | 168.8            | 167.0              | 169.6     |
| 15 $\alpha$ -16 $\alpha$ | 30.2             | 22.2               | 27.6      |
| 15 $\beta$ -16 $\alpha$  | 143.1            | 143.5              | 155.2     |

15 $\beta$ -16 $\beta$ 

27.4

13.1

23.8

---

<sup>a</sup> The dihedral angles in degree deduced from the vicinal  $^3J_{H-H}$  coupling constants according to Bothner-By equation <sup>[20]</sup>.

<sup>b</sup> The dihedral angles extracted from the X-ray structure of **2** reported in literature <sup>[22]</sup>.

**Table S4.** H(X)-C-C-H(Y) dihedral angles deduced from the vicinal  $^3J_{H-H}$  coupling constants of **3**

| X-Y                      | NMR <sup>a</sup> | X-ray <sup>b</sup> | Ab initio |
|--------------------------|------------------|--------------------|-----------|
| 1 $\alpha$ -2 $\alpha$   | 55.4             | 59.5               | 54.1      |
| 1 $\beta$ -2 $\alpha$    | 65.5             | 64.1               | 64.3      |
| 1 $\beta$ -2 $\beta$     | 51.8             | 59.1               | 52.3      |
| 6 $\alpha$ -7 $\alpha$   | 58.6             | 56.1               | 57.3      |
| 6 $\alpha$ -7 $\beta$    | 75.2             | 50.9               | 77.2      |
| 6 $\beta$ -7 $\beta$     | 49.9             | 56.9               | 45.5      |
| 7 $\alpha$ -8            | 161.1            | 170.8              | 171.8     |
| 7 $\beta$ -8             | 65.5             | 59.3               | 51.6      |
| 8-9                      | 152.1            | 178.5              | 156.2     |
| 8-14                     | 153.5            | 173.3              | 158.3     |
| 9-11 $\alpha$            | 57.9             | 56.0               | 57.8      |
| 9-11 $\beta$             | 165.0            | 166.5              | 159.1     |
| 11 $\alpha$ -12 $\alpha$ | 48.5             | 59.1               | 49.9      |
| 11 $\alpha$ -12 $\beta$  | 71.4             | 78.8               | 70.3      |
| 11 $\beta$ -12 $\beta$   | 58.6             | 48.2               | 30.0      |
| 14 $\alpha$ -15 $\alpha$ | 39.4             | 30.7               | 36.0      |
| 14 $\alpha$ -15 $\beta$  | 165.0            | 169.1              | 166.9     |
| 15 $\alpha$ -16 $\alpha$ | 23.4             | 2.2                | 23.4      |
| 15 $\alpha$ -16 $\beta$  | 109.9            | 118.9              | 110.4     |
| 15 $\beta$ -16 $\alpha$  | 125.2            | 133.1              | 146.2     |
| 16 $\alpha$ -17 $\alpha$ | 32.2             | 33.4               | 33.4      |
| 16 $\beta$ -17 $\alpha$  | 142.6            | 154.6              | 158.3     |

<sup>a</sup> The dihedral angles in degree deduced from the vicinal  $^3J_{H-H}$  coupling constants according to Bothner-By equation <sup>[20]</sup>.

<sup>b</sup> The dihedral angles extracted from the X-ray structure of **3** reported in literature <sup>[23]</sup>.

**Table S5.** H(X)-C-C-H(Y) dihedral angles deduced from the vicinal  $^3J_{H-H}$  coupling constants of **4**

| X-Y                      | NMR <sup>a</sup> | X-ray <sup>b</sup> | Ab initio |
|--------------------------|------------------|--------------------|-----------|
| 1 $\alpha$ -2 $\alpha$   | 60.7             | 56.7               | 64.7      |
| 1 $\alpha$ -2 $\beta$    | ?                | 176.7              | -         |
| 1 $\beta$ -2 $\alpha$    | 65.5             | 61.2               | 61.2      |
| 1 $\beta$ -2 $\beta$     | 62.3             | 58.9               | 64.7      |
| 2 $\alpha$ -3            | 57.8             | 57.7               | 59.4      |
| 2 $\beta$ -3             | 157.0            | 177.7              | 178.9     |
| 3-4 $\alpha$             | 52.8             | 55.7               | 53.7      |
| 3-4 $\beta$              | 154.2            | 174.5              | 150.4     |
| 6-7 $\alpha$             | 79.5             | 73.8               | 82.1      |
| 6-7 $\beta$              | 50.2             | 44.8               | 50.4      |
| 7 $\alpha$ -8            | 150.8            | 162.3              | 175.9     |
| 7 $\beta$ -8             | 52.5             | 43.7               | 53.1      |
| 8-9                      | 154.2            | 176.7              | 151.2     |
| 8-14                     | 161.1            | 175.0              | 157.0     |
| 9-11 $\alpha$            | 55.8             | 55.9               | 53.5      |
| 9-11 $\beta$             | 165.0            | 173.5              | 164.0     |
| 11 $\alpha$ -12 $\alpha$ | 60.4             | 54.4               | 60.4      |
| 11 $\alpha$ -12 $\beta$  | 67.8             | 64.9               | 69.6      |
| 11 $\beta$ -12 $\alpha$  | ?                | 172.0              | ?         |
| 11 $\beta$ -12 $\beta$   | 60.0             | 52.6               | 38.3      |
| 14 $\alpha$ -15 $\alpha$ | 39.4             | 39.7               | 35.2      |
| 14 $\alpha$ -15 $\beta$  | 152.8            | 162.4              | 159.5     |
| 15 $\alpha$ -16 $\alpha$ | 23.0             | 20.7               | 20.0      |
| 15 $\alpha$ -16 $\beta$  | 107.5            | 141.3              | 107.8     |
| 15 $\beta$ -16 $\alpha$  | 124.9            | 129.8              | 108.4     |
| 15 $\beta$ -16 $\beta$   | ?                | 8.6                | ?         |
| 16 $\alpha$ -17 $\alpha$ | 27.0             | 24.8               | 27.8      |
| 16 $\beta$ -17 $\alpha$  | 144.3            | 146.0              | 137.9     |

<sup>a</sup> The dihedral angles in degree deduced from the vicinal  $^3J_{H-H}$  coupling constants according to

Bothner-By equation <sup>[20]</sup>.

<sup>b</sup> The dihedral angles extracted from the X-ray structure of 3 $\beta$ -hydroxyregn-5-en-20-one reported in literature <sup>[26]</sup>.



**Table S6.** H(X)-C-C-H(Y) dihedral angles deduced from the vicinal  $^3J_{H-H}$  coupling constants of **5**

| X-Y                      | NMR <sup>a</sup> | X-ray <sup>b</sup> | Ab initio |
|--------------------------|------------------|--------------------|-----------|
| 1 $\alpha$ -2 $\alpha$   | 18.0             | 0.0                | 18.8      |
| 6 $\alpha$ -7 $\alpha$   | 55.0             | 51.7               | 54.1      |
| 6 $\beta$ -7 $\beta$     | 49.3             | 52.8               | 49.2      |
| 7 $\alpha$ -8            | 165.3            | 172.0              | 165.7     |
| 7 $\beta$ -8             | 59.3             | 54.7               | 49.2      |
| 8-9                      | 153.5            | 177.6              | 155.9     |
| 8-14                     | 154.9            | 174.7              | 159.2     |
| 9-11 $\alpha$            | 63.1             | 49.6               | 65.1      |
| 11 $\alpha$ -12 $\alpha$ | 72.2             | 72.5               | 72.5      |
| 11 $\alpha$ -12 $\beta$  | 62.1             | 44.7               | 60.9      |
| 14 $\alpha$ -15 $\alpha$ | 39.4             | 38.0               | 36.4      |
| 14 $\alpha$ -15 $\beta$  | 159.4            | 159.1              | 159.3     |
| 15 $\alpha$ -16 $\alpha$ | 27.4             | 4.2                | 15.5      |
| 15 $\alpha$ -16 $\beta$  | 103.7            | 115.9              | 106.7     |
| 15 $\beta$ -16 $\alpha$  | 124.9            | 125.2              | 146.9     |

<sup>a</sup> The dihedral angles in degree deduced from the vicinal  $^3J_{H-H}$  coupling constants according to Bothner-By equation <sup>[20]</sup>.

<sup>b</sup> The dihedral angles extracted from the X-ray structure of **5** reported in literature <sup>[24]</sup>.

**Table S7.** H(X)-C-C-H(Y) dihedral angles deduced from the vicinal  $^3J_{H-H}$  coupling constants of **7**

| X-Y                      | NMR <sup>a</sup> | X-ray <sup>b</sup> | Ab initio |
|--------------------------|------------------|--------------------|-----------|
| 1 $\alpha$ -2 $\alpha$   | 55.4             | 54.7               | 55.2      |
| 1 $\alpha$ -2 $\beta$    | ?                | 176.8              | 173.2     |
| 1 $\beta$ -2 $\alpha$    | 65.5             | 69.8               | 65.7      |
| 1 $\beta$ -2 $\beta$     | 51.8             | 54.5               | 52.2      |
| 6 $\alpha$ -7 $\alpha$   | 55.0             | 52.1               | 55.3      |
| 6 $\alpha$ -7 $\beta$    | ?                | 74.0               | 63.6      |
| 6 $\beta$ -7 $\beta$     | 49.3             | 58.9               | 52.8      |
| 7 $\alpha$ -8            | 165.3            | 178.9              | 164.0     |
| 7 $\beta$ -8             | 59.3             | 51.0               | 55.8      |
| 8-9                      | 153.5            | 173.2              | 152.6     |
| 8-14                     | 154.9            | 177.7              | 154.4     |
| 9-11 $\alpha$            | 63.1             | 54.1               | 63.6      |
| 11 $\alpha$ -12 $\alpha$ | 72.2             | 49.1               | 73.4      |
| 11 $\alpha$ -12 $\beta$  | 62.1             | 61.3               | 58.3      |
| 14 $\alpha$ -15 $\alpha$ | 39.4             | 35.9               | 43.6      |
| 14 $\alpha$ -15 $\beta$  | 159.4            | 166.5              | 158.9     |
| 15 $\alpha$ -16 $\alpha$ | 27.4             | 4.3                | 27.6      |
| 15 $\alpha$ -16 $\beta$  | 103.7            | 119.7              | 107.3     |
| 15 $\beta$ -16 $\alpha$  | 124.9            | 130.6              | 148.1     |
| 15 $\beta$ -16 $\beta$   | ?                | 6.6                | 13.0      |

<sup>a</sup> The dihedral angles in degree deduced from the vicinal  $^3J_{H-H}$  coupling constants according to Bothner-By equation <sup>[20]</sup>.

<sup>b</sup> The dihedral angles extracted from the X-ray structure of **7** reported in literature <sup>[25]</sup>.

**Table S8.**  $^1\text{H}/^1\text{H}$  NOE constraints deduced from 2D NOESY spectra of steroidal compounds

| Atom         | NOE constraints of compound <b>1</b>                                                                       |
|--------------|------------------------------------------------------------------------------------------------------------|
| H1 $\beta$   | H11 $\alpha$ , H19                                                                                         |
| H2 $\beta$   | H19                                                                                                        |
| H4 $\alpha$  | H6 $\alpha$ , H6 $\beta$                                                                                   |
| H4 $\beta$   | H6 $\alpha$ , H6 $\beta$ , H19                                                                             |
| H6 $\alpha$  | H4 $\alpha$ , H4 $\beta$ , H19                                                                             |
| H6 $\beta$   | H4 $\alpha$ , H4 $\beta$ , H19                                                                             |
| H7 $\beta$   | H15 $\beta$                                                                                                |
| H11 $\alpha$ | H1 $\beta$ , H19                                                                                           |
| H14          | H12 $\alpha$ , H18                                                                                         |
| H15 $\beta$  | H7 $\beta$ , H18                                                                                           |
| H17          | H12 $\alpha$                                                                                               |
| H18          | H8, H11 $\beta$ , H12 $\alpha$ , H14, H15 $\beta$ , H16 $\alpha$                                           |
| H19          | H1 $\beta$ , H2 $\beta$ , H4 $\beta$ , H6 $\alpha$ , H6 $\beta$ , H11 $\alpha$ , H11 $\beta$ , H12 $\beta$ |

| Atom         | NOE constraints of compound <b>2</b> |
|--------------|--------------------------------------|
| H3 $\alpha$  | H6 $\alpha$ , H6 $\beta$ , H19       |
| H5 $\alpha$  | H9, H19                              |
| H6 $\alpha$  | H3 $\alpha$                          |
| H6 $\beta$   | H3 $\alpha$                          |
| H7 $\alpha$  | H15 $\alpha$                         |
| H7 $\beta$   | H15 $\alpha$                         |
| H7 $\beta$   | H15 $\beta$                          |
| H8           | H1 $\beta$ , H19                     |
| H11 $\alpha$ | H1 $\alpha$                          |
| H9           | H1 $\alpha$ , H5 $\alpha$            |
| H15 $\alpha$ | H7 $\alpha$ , H7 $\beta$             |
| H16 $\beta$  | H18                                  |
| H18          | H8                                   |
| H19          | H5 $\alpha$ , H8                     |

| Atom         | NOE constraints of compound <b>3</b>                                               |
|--------------|------------------------------------------------------------------------------------|
| H1 $\alpha$  | H9, H19                                                                            |
| H1 $\beta$   | H6 $\beta$ , H8, H9, H11 $\alpha$ , H11 $\beta$ , H16 $\alpha$ , H16 $\beta$ , H19 |
| H2 $\alpha$  | H9, H19                                                                            |
| H2 $\beta$   | H9, H11 $\alpha$ , H19                                                             |
| H6 $\alpha$  | H14                                                                                |
| H6 $\beta$   | H1 $\beta$ , H14, H15 $\alpha$ , H19                                               |
| H7 $\beta$   | H14, H11 $\alpha$ , H15 $\alpha$ , H15 $\beta$                                     |
| H11 $\alpha$ | H1 $\beta$ , H15 $\beta$ , H18, H19                                                |
| H11 $\beta$  | H1 $\beta$ , H18, H19                                                              |
| H12 $\beta$  | H15 $\alpha$ , H15 $\beta$ , H16 $\alpha$ , H16 $\beta$                            |

|             |                                                                                                                             |
|-------------|-----------------------------------------------------------------------------------------------------------------------------|
| H15 $\beta$ | H7 $\beta$ , H11 $\alpha$ , H12 $\beta$                                                                                     |
| H16 $\beta$ | H1 $\beta$ , H7 $\beta$                                                                                                     |
| H17         | H9, H11 $\alpha$ , H11 $\beta$ , H12 $\alpha$ , H12 $\beta$ , H14                                                           |
| H18         | H8, H11 $\alpha$ , H11 $\beta$ , H12 $\beta$ , H15 $\alpha$ , H15 $\beta$ , H16 $\alpha$ , H19                              |
| H19         | H1 $\alpha$ , H2 $\alpha$ , H2 $\beta$ , H6 $\beta$ , H8, H9, H11 $\alpha$ , H11 $\beta$ , H16 $\alpha$ , H16 $\beta$ , H18 |

| Atom         | NOE constraints of compound <b>4</b>                                                                                   |
|--------------|------------------------------------------------------------------------------------------------------------------------|
| H1 $\beta$   | H11 $\alpha$                                                                                                           |
| H2 $\alpha$  | H11 $\alpha$                                                                                                           |
| H3           | H18, H19                                                                                                               |
| H4 $\alpha$  | H19                                                                                                                    |
| H4 $\beta$   | H19                                                                                                                    |
| H6           | H1 $\alpha$ , H1 $\beta$ , H2 $\beta$ , H9, H11 $\beta$ , H12 $\alpha$ , H12 $\beta$ , H15 $\beta$ , H16 $\beta$ , H19 |
| H7 $\alpha$  | H14                                                                                                                    |
| H7 $\beta$   | H15 $\alpha$ , H15 $\beta$                                                                                             |
| H11 $\alpha$ | H1 $\beta$ , H2 $\alpha$                                                                                               |
| H12 $\alpha$ | H19, H21                                                                                                               |
| H14          | H7 $\alpha$ , H18, H19                                                                                                 |
| H15 $\beta$  | H7 $\beta$ , H18, H19                                                                                                  |
| H16 $\beta$  | H4 $\beta$ , H18                                                                                                       |
| H17          | H2 $\beta$ , H4 $\beta$ , H14                                                                                          |
| H18          | H2 $\beta$ , H3, H7 $\alpha$ , H8, H11 $\alpha$ , H11 $\beta$ , H14, H15 $\beta$ , H19                                 |
| H19          | H3, H8, H12 $\alpha$ , H14, H16 $\beta$                                                                                |
| H21          | H12 $\alpha$ , H12 $\beta$ , H16 $\alpha$ , H16 $\beta$ , H18, H19                                                     |

| Atom         | NOE constraints of compound <b>5</b>                           |
|--------------|----------------------------------------------------------------|
| H1           | H11 $\alpha$ .H19                                              |
| H4           | H6 $\alpha$                                                    |
| H6 $\alpha$  | H4                                                             |
| H6 $\beta$   | H19                                                            |
| H7 $\alpha$  | H14                                                            |
| H7 $\beta$   | H15 $\alpha$ , H15 $\beta$ , H19                               |
| H8           | H18                                                            |
| H11 $\alpha$ | H1                                                             |
| H12 $\alpha$ | H19, H21a                                                      |
| H12 $\beta$  | H14                                                            |
| H14          | H12 $\beta$ , H19                                              |
| H15 $\alpha$ | H7 $\beta$ , H19                                               |
| H15 $\beta$  | H7 $\beta$ , H18                                               |
| H16 $\alpha$ | H18                                                            |
| H16 $\beta$  | H18                                                            |
| H18          | H8, H15 $\beta$ , H16 $\alpha$ , H16 $\beta$                   |
| H19          | H1, H6 $\beta$ , H7 $\beta$ , H12 $\alpha$ , H14, H15 $\alpha$ |
| H21a         | H12 $\alpha$                                                   |

| Atom         | NOE constraints of compound 7                                         |
|--------------|-----------------------------------------------------------------------|
| H1 $\alpha$  | H9                                                                    |
| H1 $\beta$   | H19                                                                   |
| H2 $\alpha$  | H9                                                                    |
| H2 $\beta$   | H19                                                                   |
| H4           | H6 $\alpha$                                                           |
| H6 $\beta$   | H19                                                                   |
| H7 $\alpha$  | H14                                                                   |
| H7 $\beta$   | H15 $\alpha$                                                          |
| H8           | H15 $\alpha$ , H15 $\beta$ , H18, H19                                 |
| H9           | H1 $\alpha$ , H2 $\alpha$ , H14, H15 $\alpha$                         |
| H11 $\alpha$ | H1 $\alpha$ , H1 $\beta$ , H19                                        |
| H14          | H7 $\alpha$ , H7 $\beta$ , H9                                         |
| H15 $\alpha$ | H7 $\beta$ , H8, H9                                                   |
| H15 $\beta$  | H8, H18                                                               |
| H16 $\alpha$ | H19                                                                   |
| H16 $\beta$  | H18, H19                                                              |
| H18          | H21a                                                                  |
| H19          | H1 $\beta$ , H2 $\beta$ , H6 $\beta$ , H8, H16 $\alpha$ , H16 $\beta$ |
| H21a         | H12 $\alpha$ , H18                                                    |
